# Supplementary material for: Designing mixed-metal electrocatalyst systems for photoelectrochemical dinitrogen activation
Source: Royal Society of Chemistry journal article supplement (doi:10.1039/d2fd00157h), 2023-01-01
Supplement: d2fd00157h1.pdf [file d2fd00157h1.pdf]

# Designing Mixed-Metal Electrocatalyst Systems for Photoelectrochemical Dinitrogen Activation

Manpreet Kaur, Marc Walker, Steven Hindmarsh, Charlotte Bolt, Stephen York, Yisong Han, Martin R. Lees, Katharina Brinkert\*

\*[katharina.brinkert@warwick.ac.uk](mailto:katharina.brinkert@warwick.ac.uk)

## Contents

|                                                                                 |           |
|---------------------------------------------------------------------------------|-----------|
| <b>1 Nitrogen 1s XP spectra</b>                                                 | <b>2</b>  |
| Fig. S1                                                                         | 2         |
| <b>2 Grain masks used in Gwyddion to calculate maximum height distributions</b> | <b>3</b>  |
| Fig. S2                                                                         | 3         |
| <b>3 Table of XPS binding energies</b>                                          | <b>4</b>  |
| Table S1                                                                        | 4         |
| <b>4 Magnetisation of the p-InP substrate</b>                                   | <b>5</b>  |
| Fig. S3                                                                         | 5         |
| <b>5 XP spectrum of MoCl<sub>3</sub> reagent</b>                                | <b>6</b>  |
| Fig. S4                                                                         | 6         |
| <b>6 Photoelectrode surface characterisation</b>                                | <b>7</b>  |
| Fig. S5                                                                         | 7         |
| Fig. S6                                                                         | 8         |
| Fig. S7                                                                         | 9         |
| Fig. S8                                                                         | 10        |
| Fig. S9                                                                         | 11        |
| Fig. S10                                                                        | 12        |
| <b>7 Co-photoelectrodepositions of Co, Mo and Ru</b>                            | <b>13</b> |
| Fig. S11                                                                        | 13        |
| Fig. S12                                                                        | 14        |
| <b>8 Magnetometry data for the consecutively deposited electrodes</b>           | <b>15</b> |
| Fig. S13                                                                        | 15        |
| Fig. S14                                                                        | 16        |
| Fig. S15                                                                        | 17        |
| Fig. S16                                                                        | 18        |
| <b>9 References</b>                                                             | <b>19</b> |

## 1 Nitrogen 1s XP spectra

Sample XP spectra for the N 1s region were obtained for consecutively deposited p-InP-Mo-Co electrodes from the  $\text{Na}_2\text{MoO}_4$  and  $\text{CoCl}_2$ -based electrolytes and p-InP-CoMo electrodes prepared by co-photoelectrodeposition in the presence of boric acid. Both spectra do not indicate the presence of nitrogen on the photoelectrode surface.

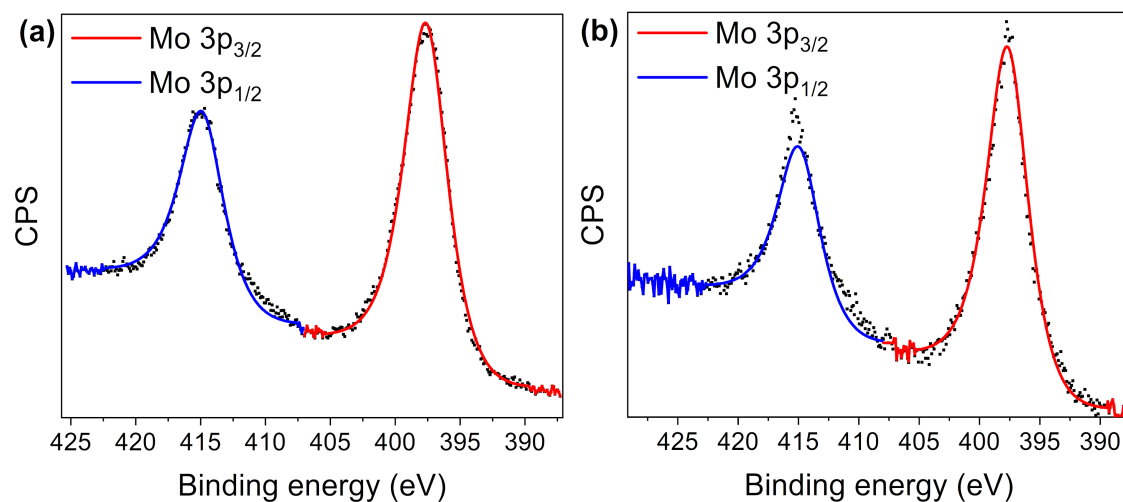

**Fig. S1** XP spectra of (a) consecutively deposited p-InP-Mo-Co photoelectrodes from  $\text{Na}_2\text{MoO}_4$  and  $\text{CoCl}_2$  electrolytes, and (b) a p-InP-CoMo photoelectrode prepared by co-deposition in the presence of boric acid. Shown is the Mo 3p and N 1s region.

## 2 Grain masks used in Gwyddion to calculate maximum height distributions

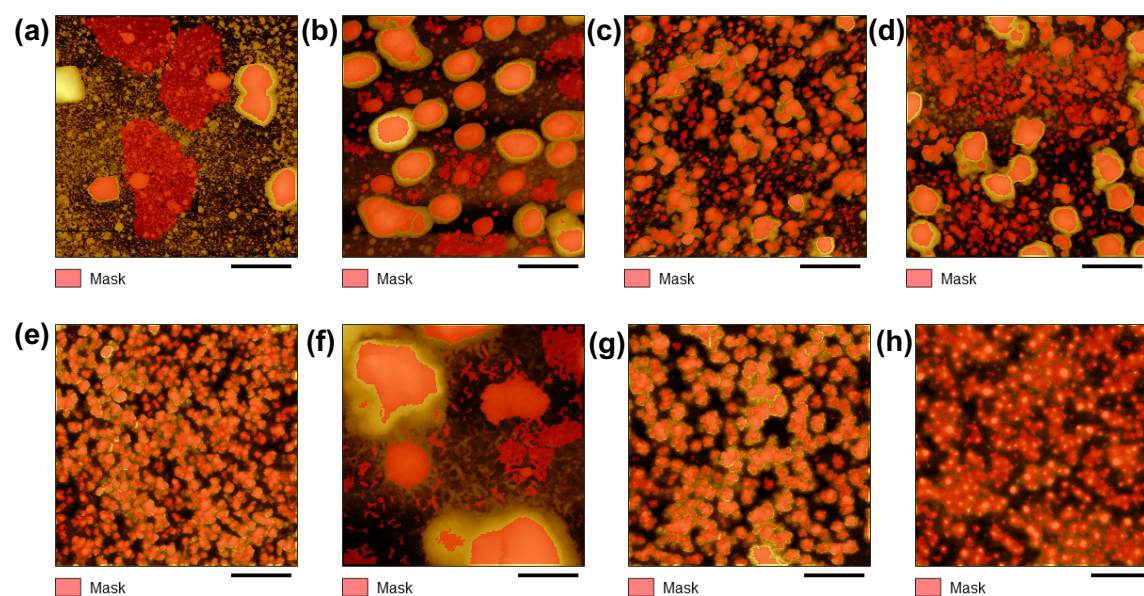

**Fig. S2** AFM images (scale bar 500 nm) masked using the watershed method to calculate the maximum height distribution data of the grains. **(a)** is the Na<sub>2</sub>MoO<sub>4</sub> - CoCl<sub>2</sub> deposition, **(b)** is the Na<sub>2</sub>MoO<sub>4</sub> - CoSO<sub>4</sub> deposition, **(c)** is the MoCl<sub>3</sub> - CoSO<sub>4</sub> deposition, **(d)** is the MoCl<sub>3</sub> - CoCl<sub>2</sub> deposition, **(e)** is the CoMo co-deposition with boric acid, **(f)** is CoMo co-deposition without boric acid, **(g)** is CoMo-Ru consecutive deposition and **(h)** is the CoMoRu co-deposition.

### 3 Table of XPS binding energies

**Table S1.** XPS binding energies obtained for the Mo 3d<sub>5/2</sub> region and component 1 of the Co 2p<sub>3/2</sub> region.<sup>1,2</sup>

| Species                    | Oxidation state                 | Binding energies (eV) |
|----------------------------|---------------------------------|-----------------------|
| <b>Mo 3d<sub>5/2</sub></b> | Mo <sup>0</sup>                 | 227.7 - 229.1         |
|                            | Mo <sup>2+</sup>                | 229.4                 |
|                            | Mo <sup>4+</sup>                | 230.5 - 232.0         |
|                            | Mo <sup>6+</sup>                | 231.8 - 232.8         |
| <b>Co 2p<sub>3/2</sub></b> | Co <sup>0</sup>                 | 777.5 - 777.9         |
|                            | Co <sup>2+</sup>                | 780.9 - 781.3         |
| <b>Mo 3p<sub>3/2</sub></b> | Mo <sup>6+</sup> (Mo-N)         | 397.8                 |
| <b>N 1s</b>                | Mo-N                            | 398.1                 |
|                            | Mo-NH <sub>2</sub>              | 400.3                 |
|                            | Mo-NH <sub>3</sub> <sup>+</sup> | 402.5                 |



#### 4 Magnetisation of the p-InP substrate

The magnetisation vs applied field plots at 5 K and 300 K for the p-InP substrate (**Fig. S13 (a)**) were fitted with a simple linear field response and used to estimate the diamagnetic contribution in the magnetisation data that arises from the substrate of each film. The magnetic susceptibility,  $M/H$ , of approximately  $-300 \times 10^{-9}$  emu/g is in reasonable agreement with previous reports.<sup>3</sup>

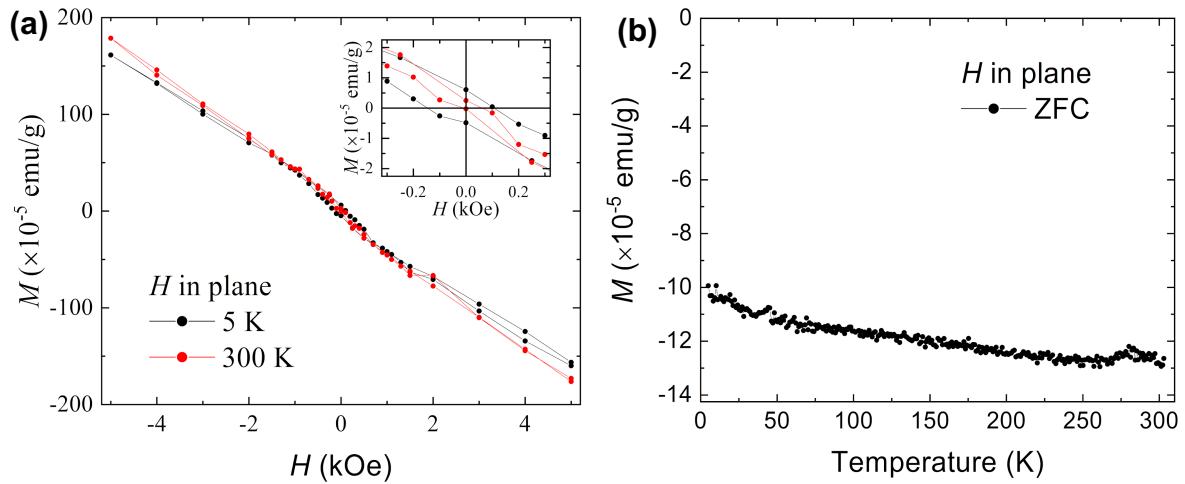

**Fig. S3** Magnetisation vs applied field plots at 5 K and 300 K of p-InP (**a**) and magnetisation vs temperature data collected in a magnetic field of 250 Oe with the field applied in the plane of the p-InP substrate (**b**).

## 5 XP spectrum of MoCl<sub>3</sub> reagent

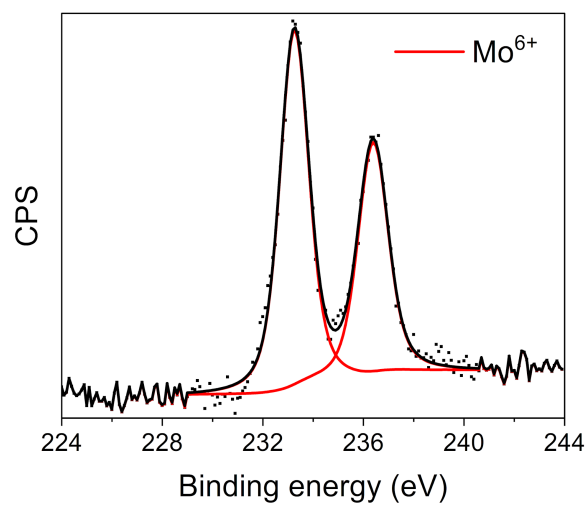

**Fig. S4** XP spectrum of the Mo 3d component in the MoCl<sub>3</sub> reagent.

## 6 Photoelectrode surface characterisation

### 6.1 Consecutive photoelectrodeposition from $\text{Na}_2\text{MoO}_4$ - $\text{CoCl}_2$ electrolytes

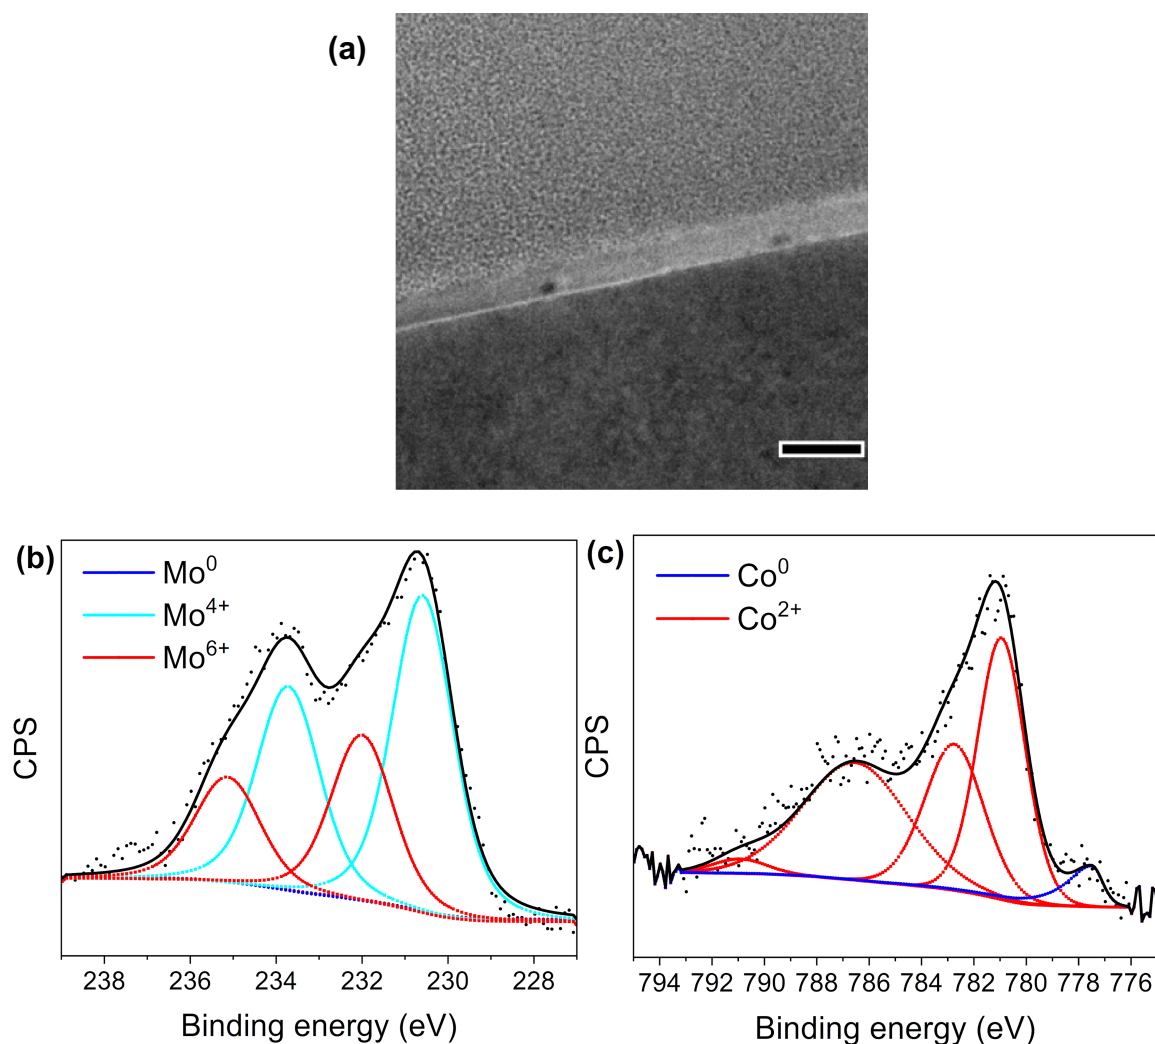

**Fig. S5** Cross-sectional TEM image with a 50 nm scale bar (a), XPS spectrum of Mo 3d (b), and XPS spectrum of Co 2p<sub>3/2</sub> (c) for the p-InP-Mo-Co electrodes prepared via photoelectrodeposition. Mo deposition was realised from an aqueous solution of  $\text{Na}_2\text{MoO}_4$  (10 mM),  $\text{Na}_2\text{SO}_4$  (1 M), and  $\text{H}_3\text{BO}_3$  (0.5 M) at a potential of -0.09 V *vs* RHE applied for 10 s. Subsequent Co deposition occurred from an aqueous solution of  $\text{CoCl}_2$  (0.1 M),  $\text{NaCl}$  (0.5 M) and 2-propanol (0.5% v/v) at a potential of -0.09 V *vs* RHE applied for 3 s. An Xe arc lamp with a power density of 100 mW/cm<sup>2</sup> was used as an illumination source.

## 6.2 Consecutive photoelectrodeposition from $\text{Na}_2\text{MoO}_4$ - $\text{CoSO}_4$ electrolytes

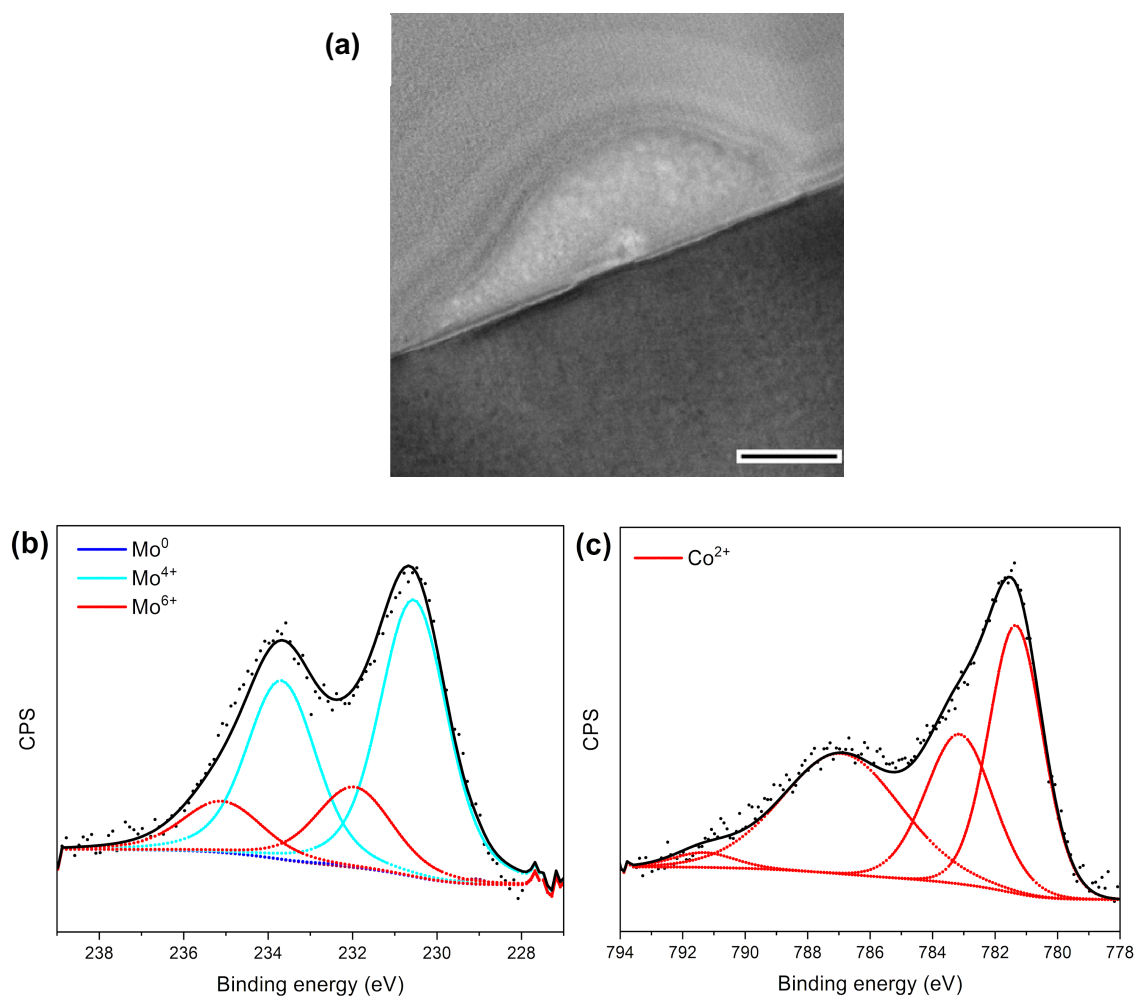

**Fig. S6** Cross-sectional TEM image with a 150 nm scale bar **(a)**, XPS spectrum of Mo 3d **(b)**, and XPS spectrum of Co 2p<sub>3/2</sub> **(c)** for the p-InP-Mo-Co electrodes prepared via photoelectrodeposition. Mo deposition was realised from an aqueous solution of  $\text{Na}_2\text{MoO}_4$  (10 mM),  $\text{Na}_2\text{SO}_4$  (1 M), and  $\text{H}_3\text{BO}_3$  (0.5 M) at a potential of  $-0.09$  V *vs* RHE applied for 10 s. Subsequent Co deposition occurred from an aqueous solution of  $\text{CoSO}_4$  (0.2 M),  $\text{Na}_2\text{SO}_4$  (1 M), and  $\text{H}_3\text{BO}_3$  (0.5 M) at a potential of  $-0.09$  V *vs* RHE applied for 3 s. An Xe arc lamp with a power density of  $100$  mW/cm<sup>2</sup> was used as an illumination source.

### 6.3 Consecutive photoelectrodepositions from MoCl<sub>3</sub> - CoSO<sub>4</sub> electrolytes

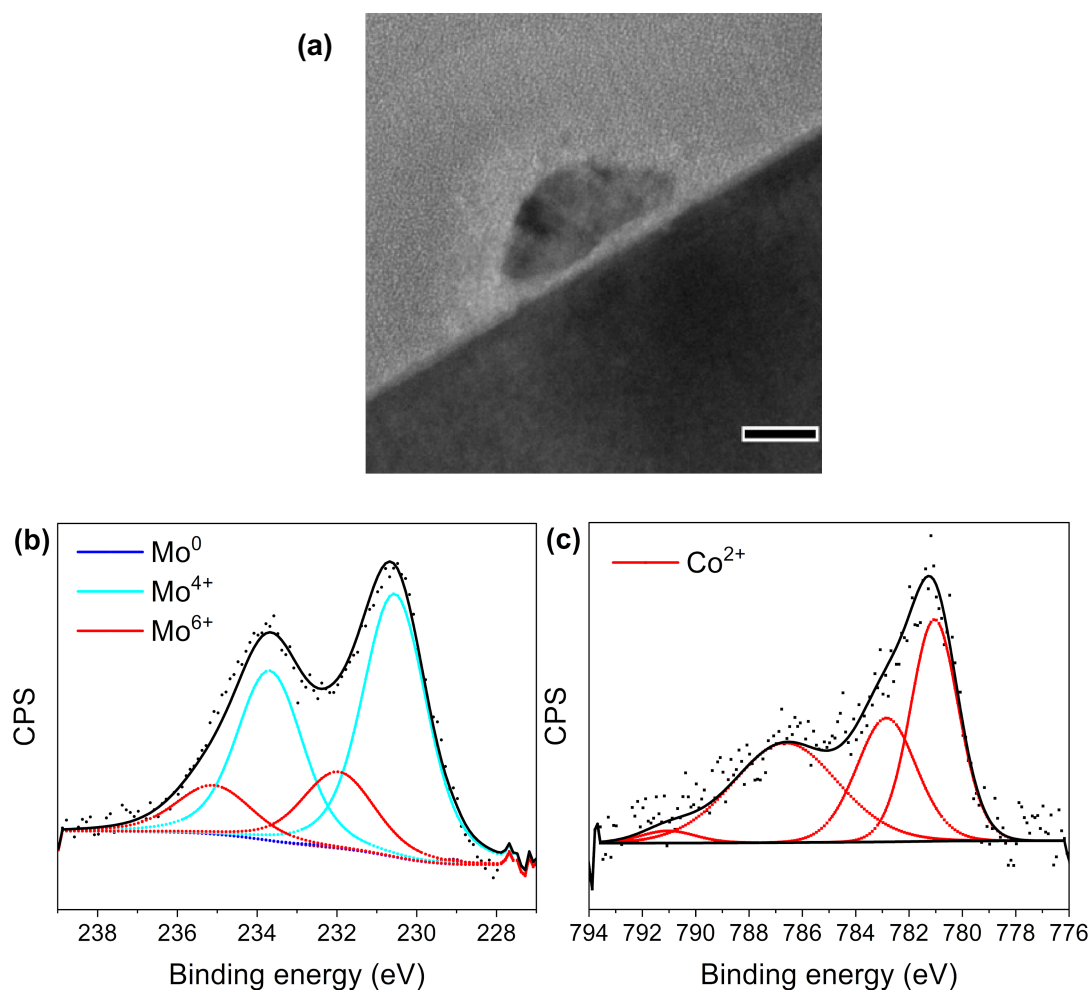

**Fig. S7** Cross-sectional TEM image with a 50 nm scale bar (a), XPS spectrum of Mo 3d (b), and XPS spectrum of Co 2p<sub>3/2</sub> (c) for the p-InP-Mo-Co electrodes prepared via photoelectrodeposition. Mo deposition was realised from an aqueous solution of MoCl<sub>3</sub> (1 mM), NaCl (0.5 M) and 2-propanol (0.5% v/v) at a potential of -0.09 V vs RHE applied for 10 s. Subsequent Co deposition occurred from an aqueous solution of CoSO<sub>4</sub> (0.2 M), Na<sub>2</sub>SO<sub>4</sub> (1 M), and H<sub>3</sub>BO<sub>3</sub> (0.5 M) at a potential of -0.09 V vs RHE applied for 3 s. An Xe arc lamp with a power density of 100 mW/cm<sup>2</sup> was used as an illumination source.

## 6.4 Consecutive photoelectrodepositions from $\text{MoCl}_3$ - $\text{CoCl}_2$ electrolytes

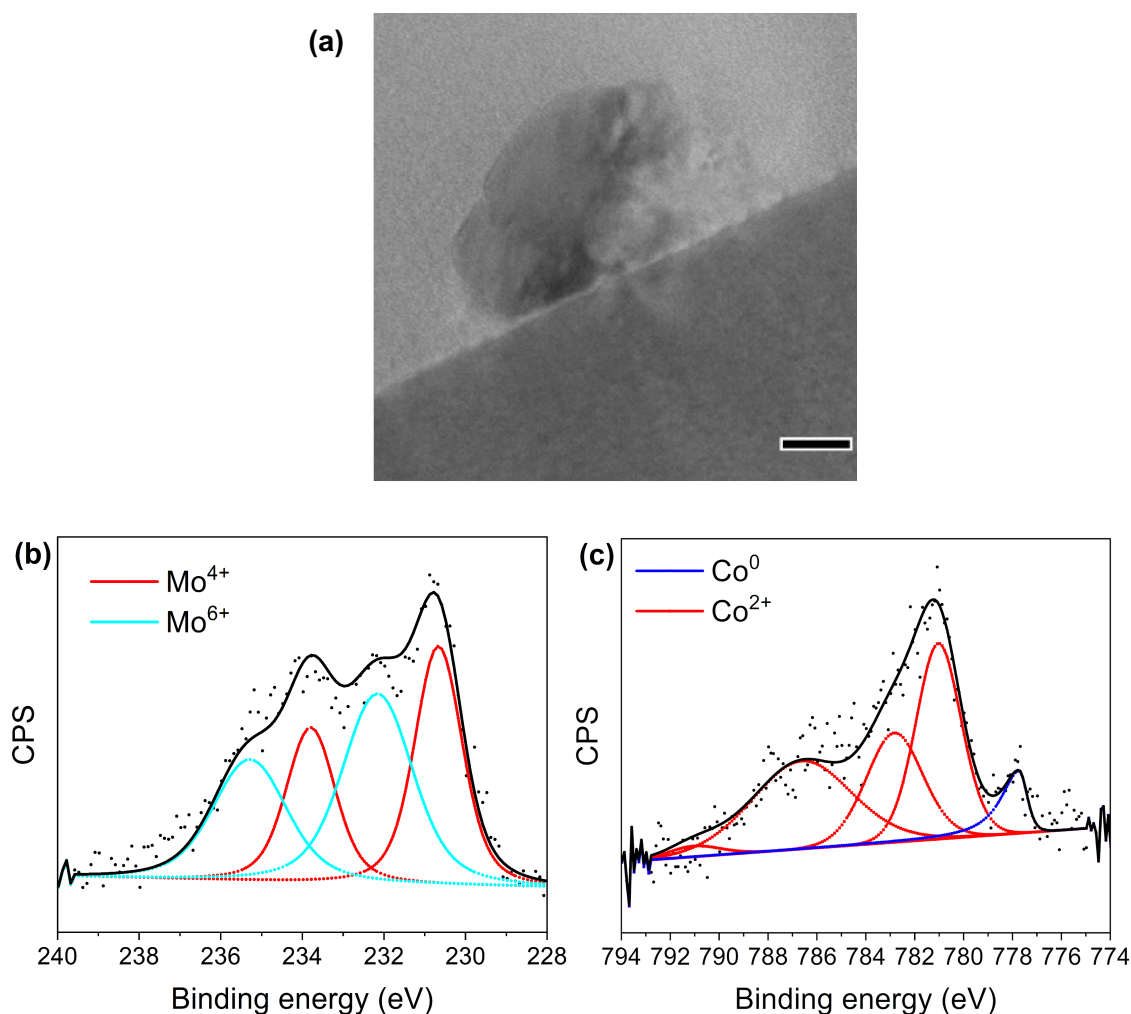

**Fig. S8** Cross-sectional TEM image with a 50 nm scale bar (a), XPS spectrum of Mo 3d (b), and XPS spectrum of Co 2p<sub>3/2</sub> (c) for the p-InP-Mo-Co electrodes prepared via photoelectrodeposition. Mo deposition was realised from an aqueous solution of  $\text{MoCl}_3$  (1 mM), NaCl (0.5 M) and 2-propanol (0.5% v/v) at a potential of -0.09 V vs RHE applied for 10 s. Subsequent Co deposition occurred from an aqueous solution of  $\text{CoCl}_2$  (0.1 M), NaCl (0.5 M) and 2-propanol (0.5% v/v) at a potential of -0.09 V vs RHE applied for 3 s. An Xe arc lamp with a power density of 100 mW/cm<sup>2</sup> was used as an illumination source.

## 6.5 Co-photoelectrodeposition of CoMo in the presence of boric acid

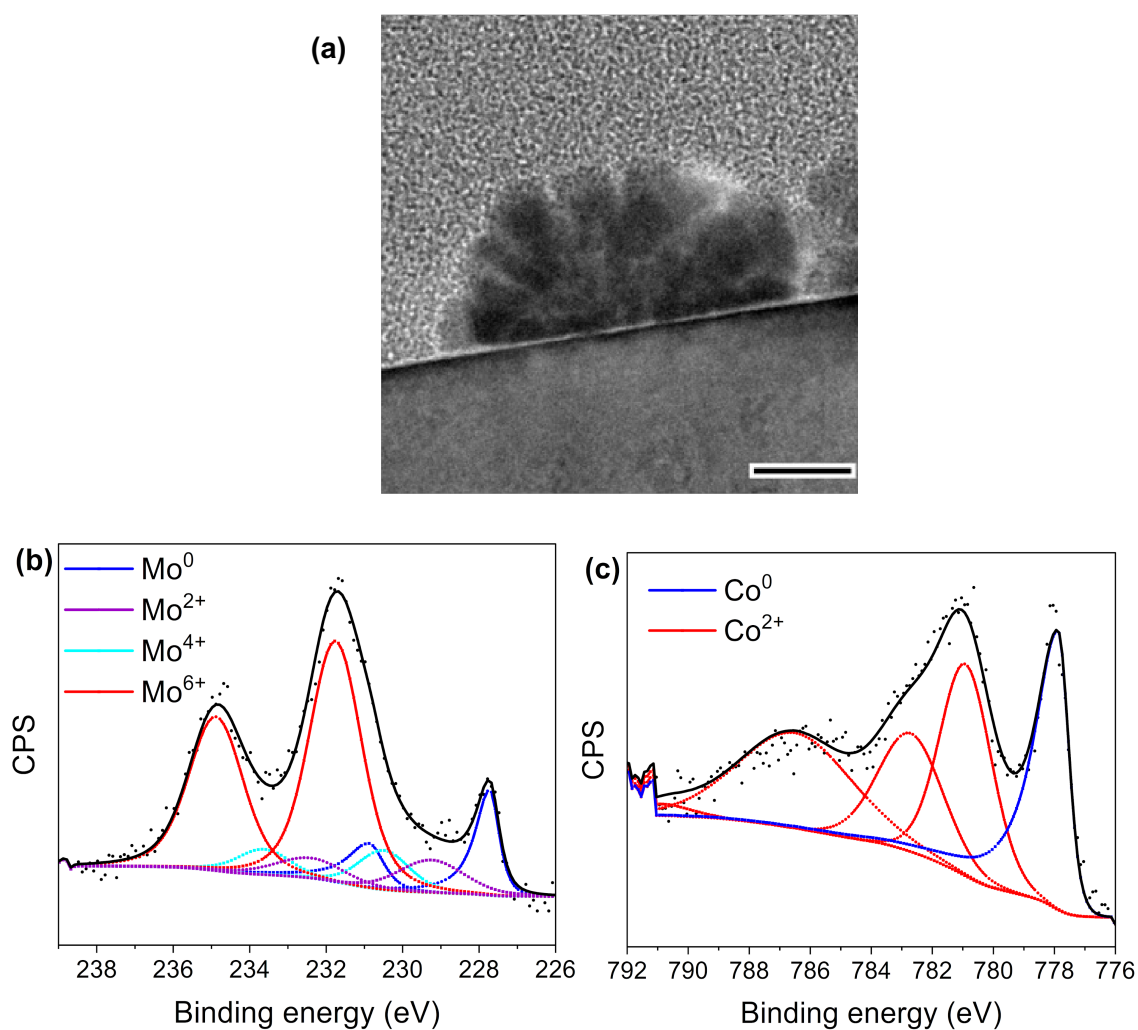

**Fig. S9** Cross-sectional TEM image with a 40 nm scale bar **(a)**, XP spectrum of Mo 3d **(b)**, and XP spectrum of Co 2p<sub>3/2</sub> **(c)** for the p-InP-CoMo electrodes prepared via co-photoelectrodeposition. An aqueous solution of CoSO<sub>4</sub> (0.2 M), Na<sub>2</sub>MoO<sub>4</sub> (10 mM), Na<sub>2</sub>SO<sub>4</sub> (1 M), and H<sub>3</sub>BO<sub>3</sub> (0.5 M) was used for the deposition and a potential of -0.09 V vs RHE was applied for 10 s. An Xe arc lamp with a power density of 100 mW/cm<sup>2</sup> was used as an illumination source.

## 6.6 Co-photoelectrodeposition of CoMo in the absence of boric acid

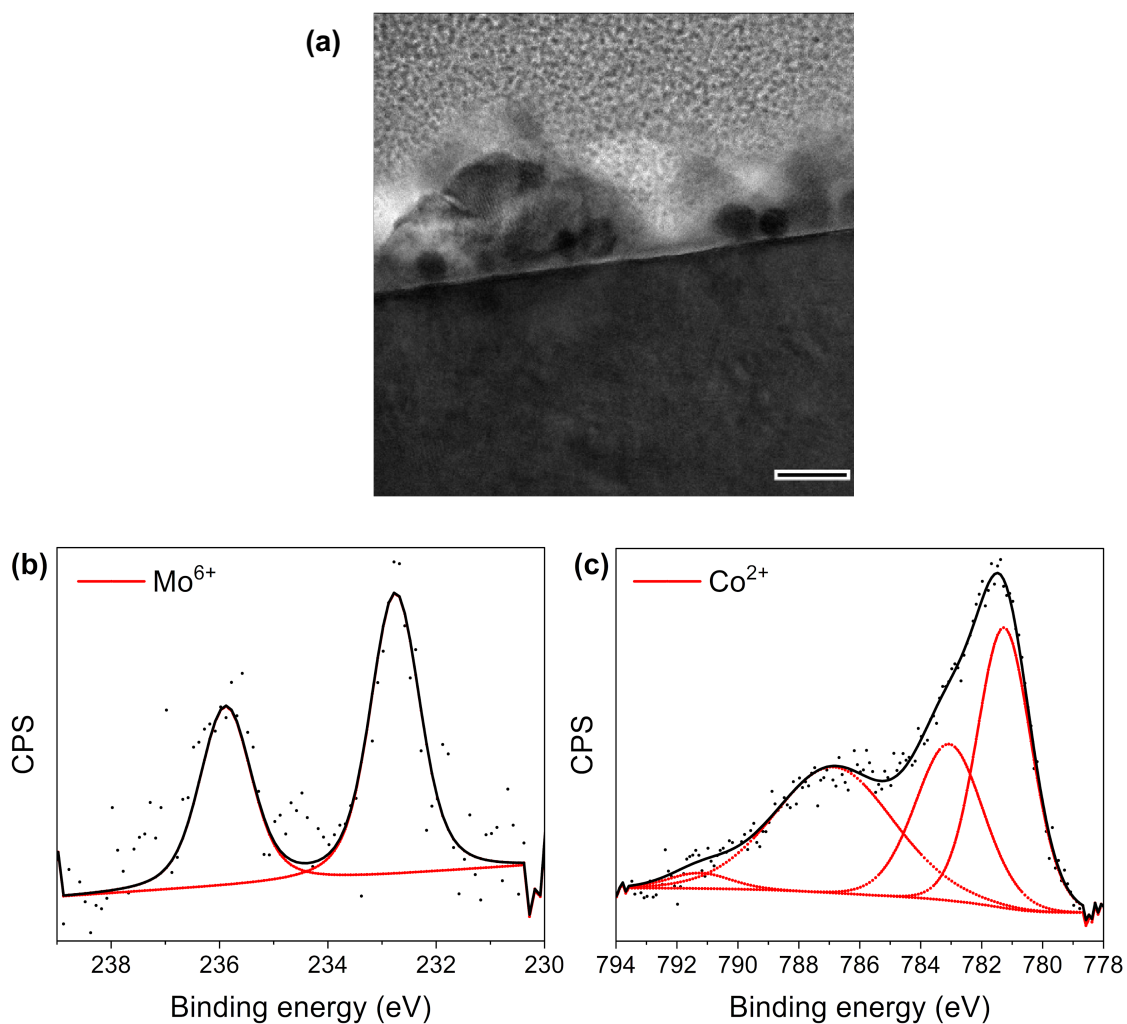

**Fig. S10** Cross-sectional TEM image with a 20 nm scale bar (a), XPS spectrum of Mo 3d (b), and XPS spectrum of Co 2p<sub>3/2</sub> (c) for the p-InP-CoMo electrodes prepared via co-photoelectrodeposition. An aqueous solution of CoSO<sub>4</sub> (0.2 M), Na<sub>2</sub>MoO<sub>4</sub> (10 mM), and Na<sub>2</sub>SO<sub>4</sub> (1 M) was used for the deposition and a potential of -0.09 V *vs* RHE was applied for 10 s. An Xe arc lamp with a power density of 100 mW/cm<sup>2</sup> was used as an illumination source.



## 7 Co-photoelectrodepositions of Co, Mo and Ru

### 7.1 p-InP-CoMo-Ru photoelectrodes

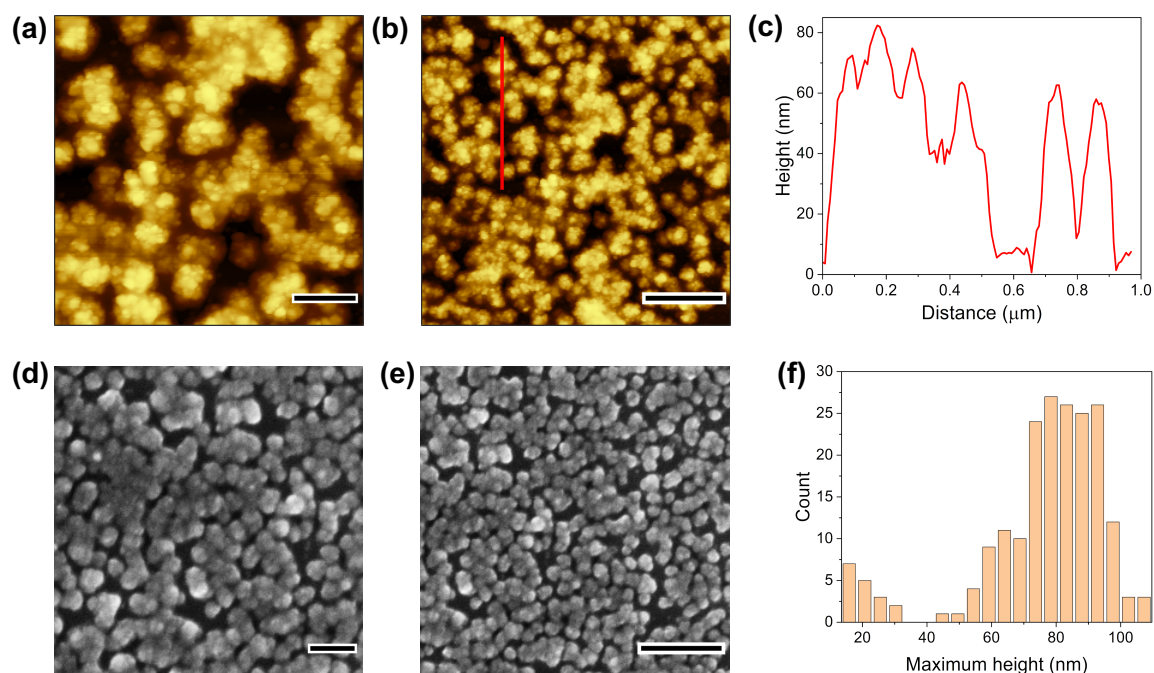

**Fig. S11** Optical analyses of the p-InP-CoMo-Ru photoelectrodes. AFM images of the electrode surface are shown with a scale bar of 200 nm **(a)** and 500 nm **(b)** with a corresponding particle height analysis **(c)** across 980 nm of the electrode surface. **(d)** and **(e)** show SEM images of the surface with scale bars of 200 nm and 500 nm, respectively. **(f)** provides an overview of the maximum particle heights found on the electrode surface. CoMo deposits were obtained firstly via photoelectrodeposition from an aqueous solution of  $\text{CoSO}_4$  (0.2 M),  $\text{Na}_2\text{MoO}_4$  (10 mM),  $\text{Na}_2\text{SO}_4$  (1 M), and  $\text{H}_3\text{BO}_3$  (0.5 M) at a potential of -0.09 V vs RHE applied for 10 s. Subsequent Ru deposition occurred from an aqueous solution of  $\text{RuCl}_3$  (0.33 mM),  $\text{NaCl}$  (0.5 M) and 2-propanol (0.5% v/v) at a potential of -0.09 V vs RHE applied for 5 s. An Xe arc lamp with a power density of 100 mW/cm<sup>2</sup> was used as an illumination source.

## 7.2 p-InP-CoMoRu photoelectrodes

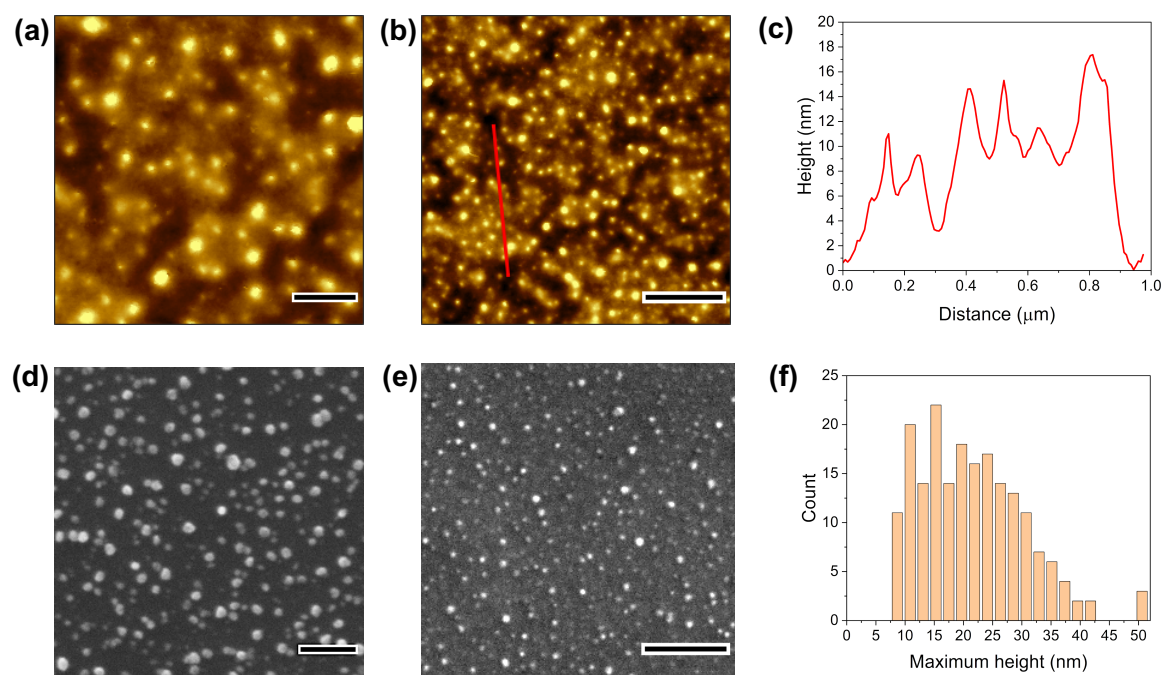

**Fig. S12** Optical analysis of the p-InP-CoMoRu photoelectrodes. CoMoRu deposits were obtained from co-photoelectrodeposition from an aqueous solution of  $\text{CoCl}_2$  (2 mM),  $\text{MoCl}_3$  (0.1 mM),  $\text{RuCl}_3$  (0.1 mM),  $\text{H}_3\text{BO}_3$  (0.1 M), and  $\text{NaCl}$  (0.5 M) at a potential of  $-0.09$  V vs RHE applied for 5 s. AFM images of the electrode surface are shown with a scale bar of 200 nm (a) and 500 nm (b) with a corresponding particle height analysis (c) across 980 nm. (d) and (e) show SEM images of the surface with scale bars of 200 nm and 500 nm, respectively. (f) provides an overview of the maximum particle height distribution found on the electrode surface.

## 8 Magnetometry data for the consecutively deposited electrodes

### 8.1 Consecutive photoelectrodepositions from $\text{Na}_2\text{MoO}_4\text{-CoCl}_2$ electrolytes

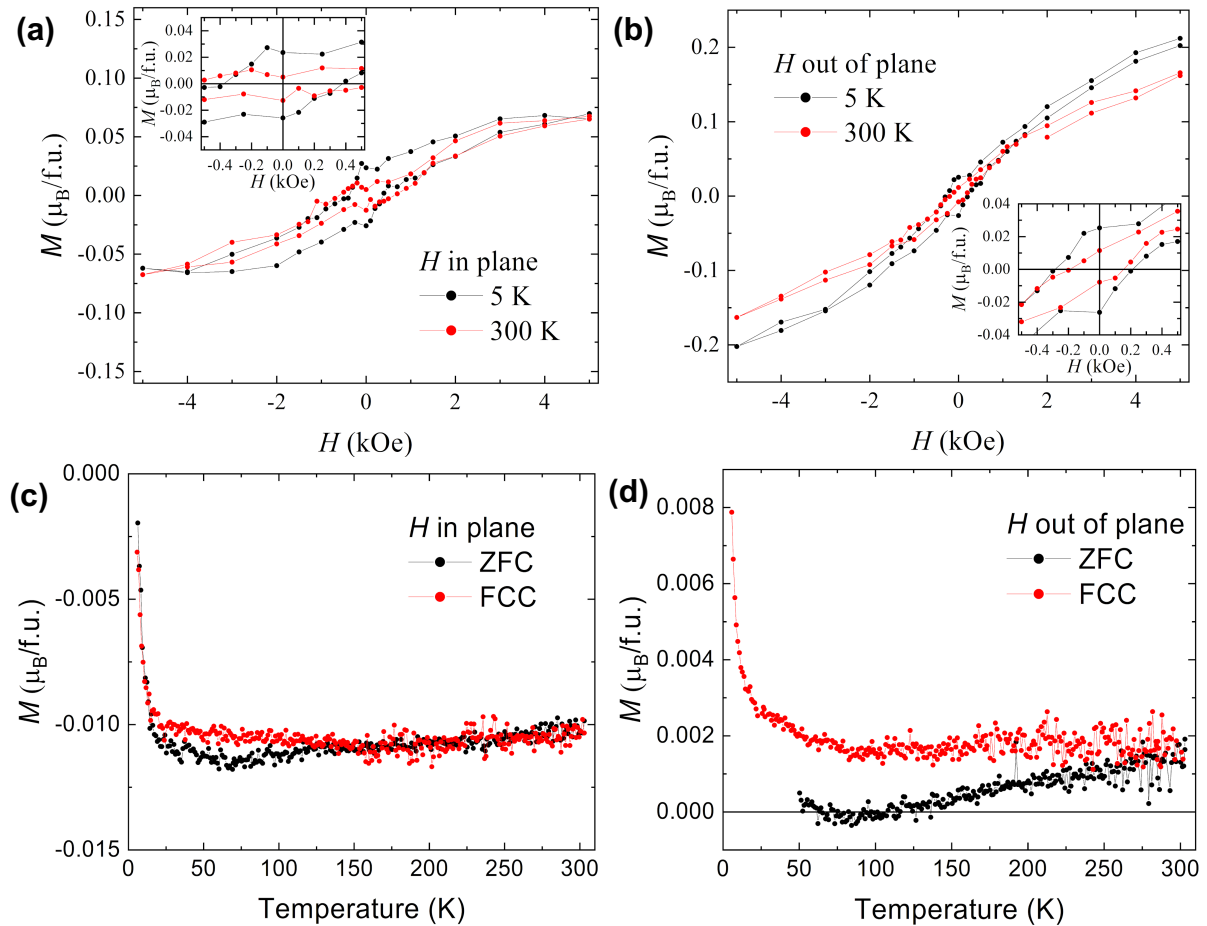

**Fig. S13** Magnetisation vs applied field plots at 5 K and 300 K with a magnetic field applied in plane (a) and out of plane (b) of the deposited film. Magnetisation vs temperature data collected in a magnetic field of 250 Oe with the field applied either parallel (c) or perpendicular (d) to the plane of the deposited film for photoelectrodepositions using  $\text{Na}_2\text{MoO}_4$  and  $\text{CoCl}_2$  electrolytes.

## 8.2 Consecutive photoelectrodepositions from $\text{Na}_2\text{MoO}_4$ - $\text{CoSO}_4$ electrolytes

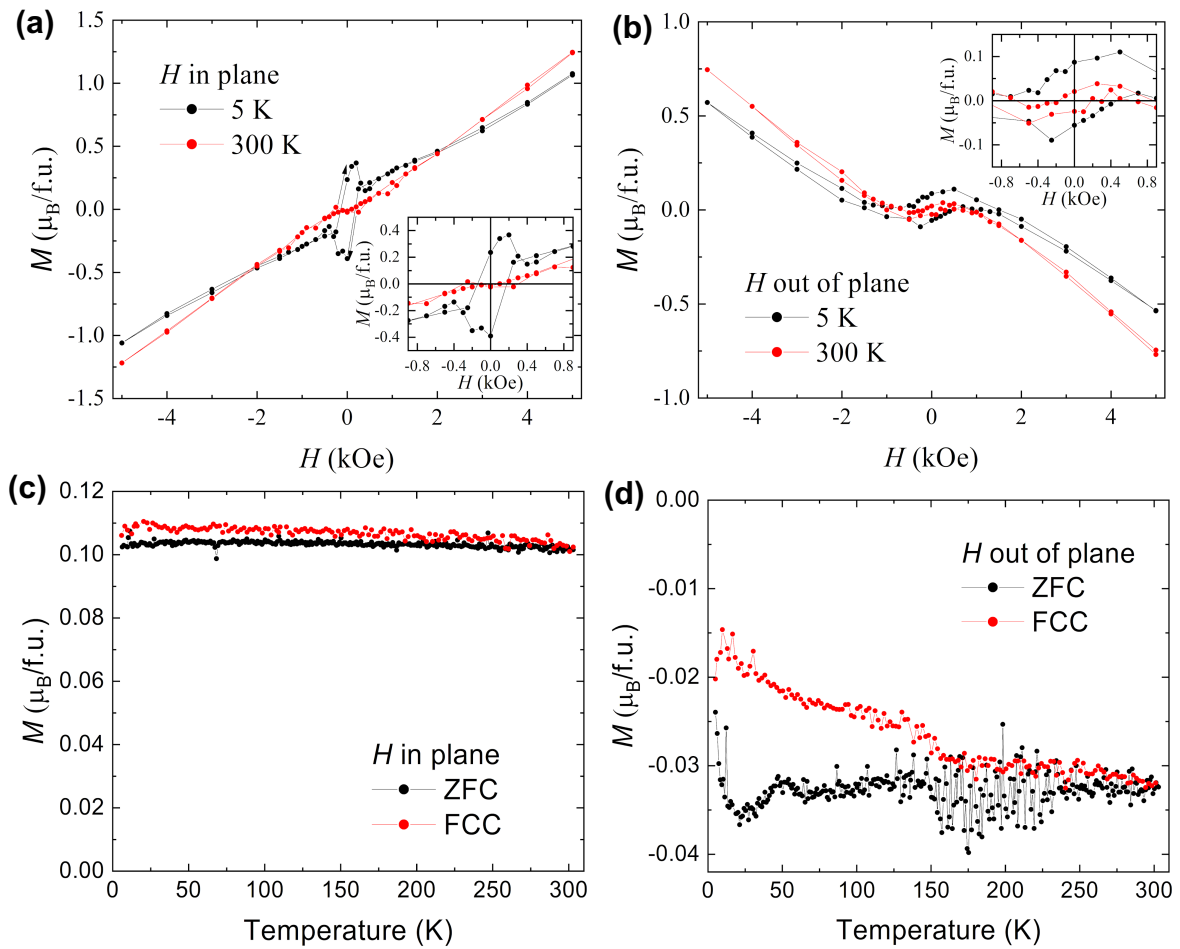

**Fig. S14** Magnetisation vs applied field plots at 5 K and 300 K with a magnetic field applied in plane (a) and out of plane (b) of the deposited film. Magnetisation vs temperature data collected in a magnetic field of 250 Oe with the field applied either parallel (c) or perpendicular (d) of the deposited film for photoelectrodepositions using  $\text{Na}_2\text{MoO}_4$  and  $\text{CoSO}_4$  electrolytes.

### 8.3 Consecutive photoelectrodepositions from $\text{MoCl}_3$ - $\text{CoSO}_4$ electrolytes

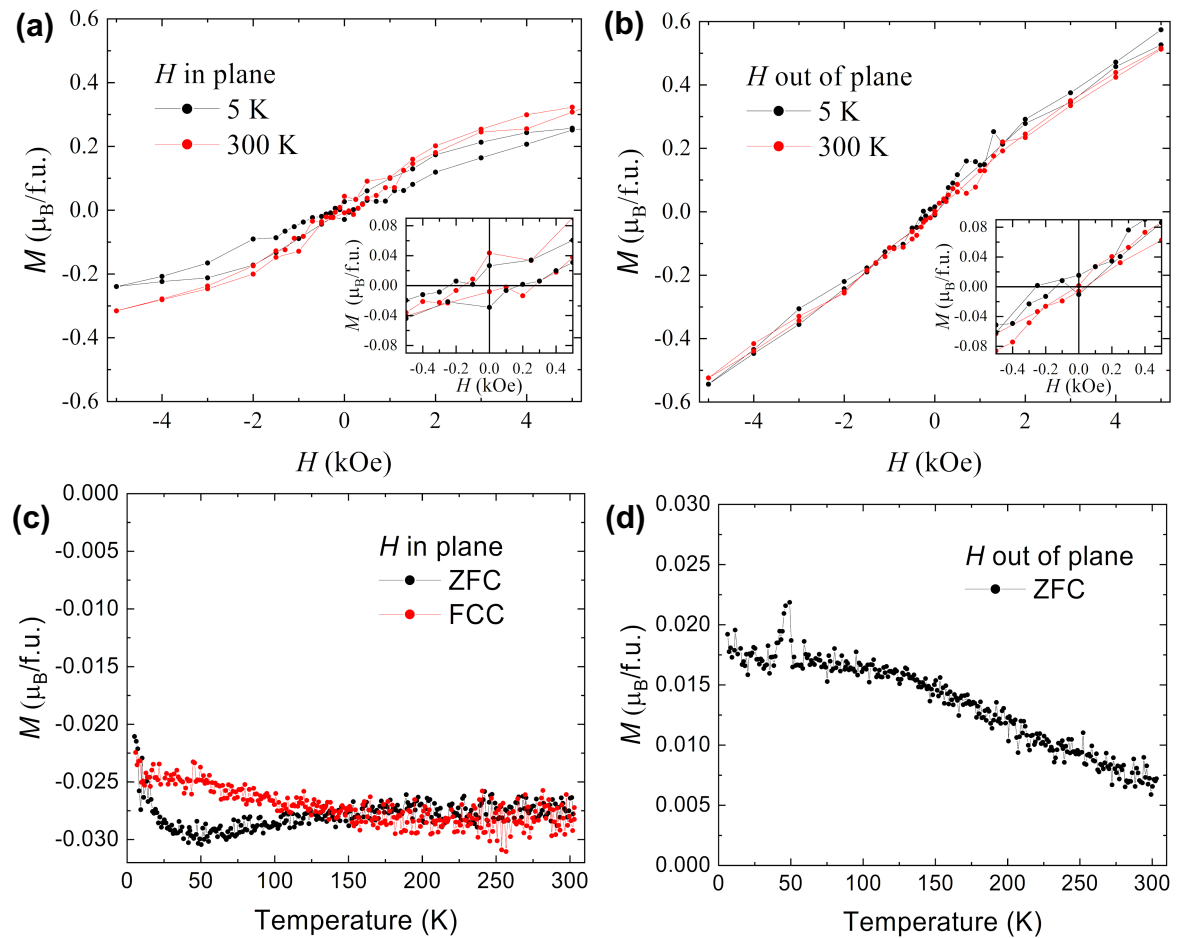

**Fig. S15** Magnetisation vs applied field plots at 5 K and 300 K with a magnetic field applied in plane (a) and out of plane (b) of the deposited film. Magnetisation vs temperature data collected in a magnetic field of 250 Oe with the field applied either parallel (c) or perpendicular (d) to the plane of the deposited film for photoelectrodepositions using  $\text{MoCl}_3$  and  $\text{CoSO}_4$  electrolytes.

### 8.4 Consecutive photoelectrodepositions from $\text{MoCl}_3$ - $\text{CoCl}_2$ electrolytes

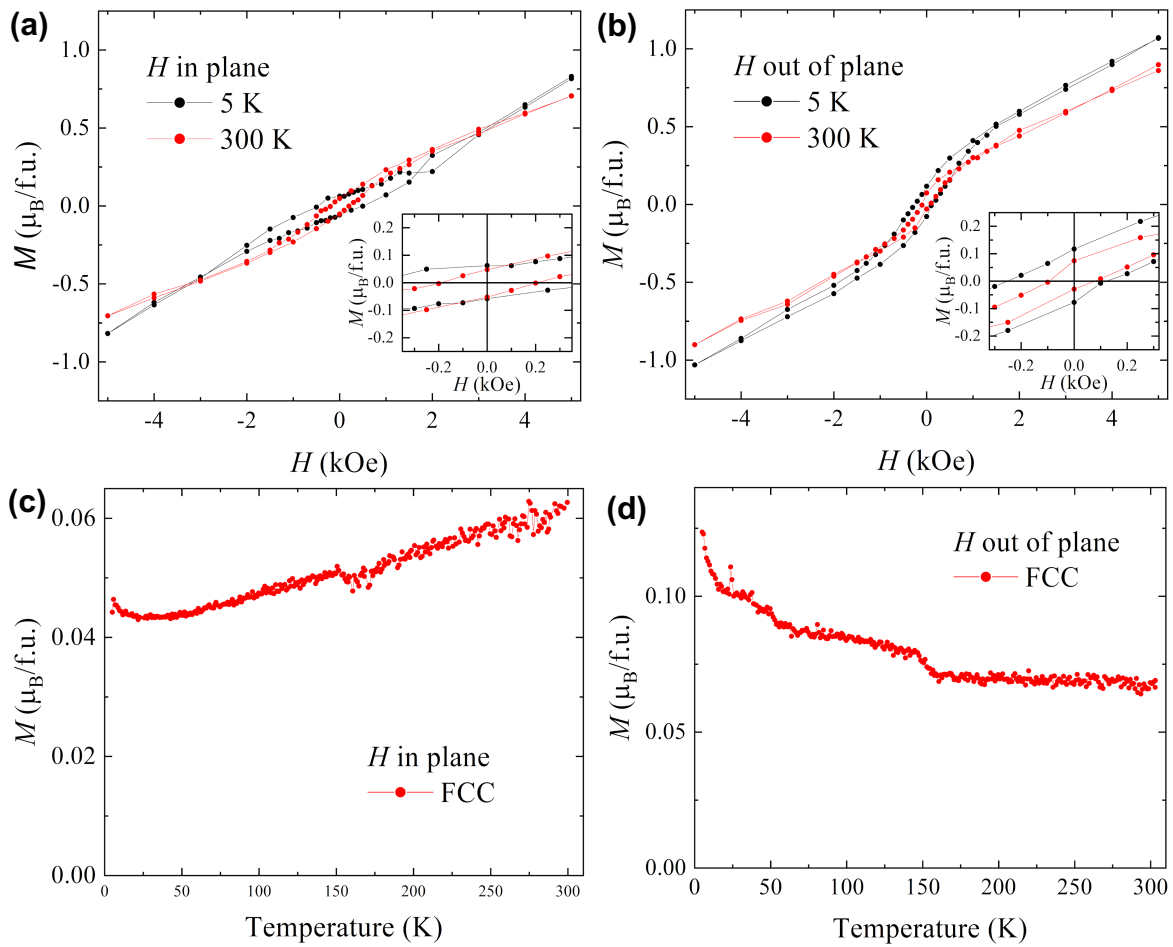

**Fig. S16** Magnetisation vs applied field plots at 5 K and 300 K with a magnetic field applied in plane (a) and out of plane (b) of the deposited film. Magnetisation vs temperature data collected in a magnetic field of 250 Oe with the field applied either parallel (c) or perpendicular to the plane (d) of the deposited film for photoelectrodepositions using  $\text{MoCl}_3$  -  $\text{CoCl}_2$  electrolytes.

## 9 References

- (1) P. A. Spevack and N. S. McIntyre, *J. Phys. Chem.*, 1992, 96, 9029-9035.
- (2) M. C. Biesinger, B. P. Payne, A. P. Grosvenor, L. W. M. Lau, A. R. Gerson and R. St. C. Smart, *Appl. Surf. Sci.*, 2011, 257, 2717-2730.
- (3) V. V. Romanov, V. A. Kozhevnikov, V. A. Mashkov and N. T. Bagraev, *Semiconductors*, 2020, 54, 1593-1597.
